# Supplementary material
Source: HighWire-hosted journal article supplement (https://www.cmajopen.ca/highwire/filestream/87097/field_highwire_adjunct_files/1/2020-0295-2-at.pdf)

Appendix 2: Age-standardized incidence and prevalence trend analysis of primary malignant central nervous system tumours and all cancers

Pediatric (A-B), adult (C-D), elderly (E-F), and all cancers (G-H).

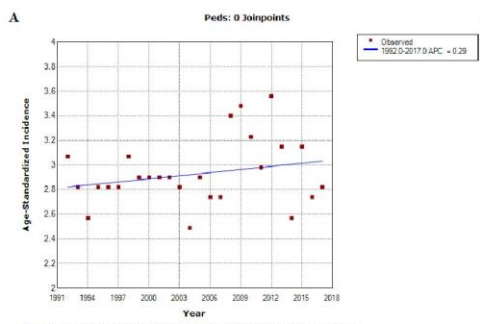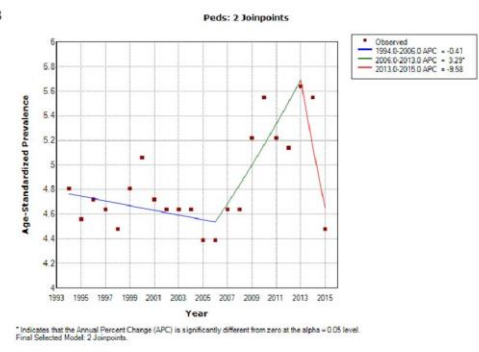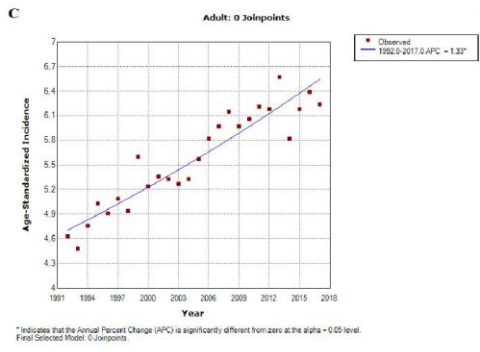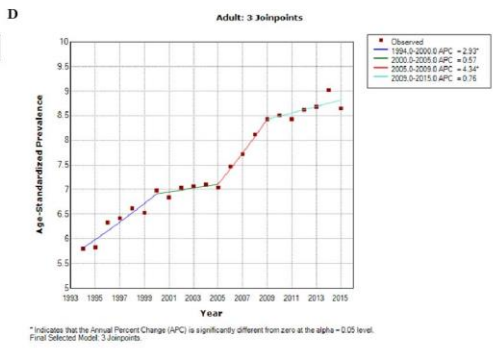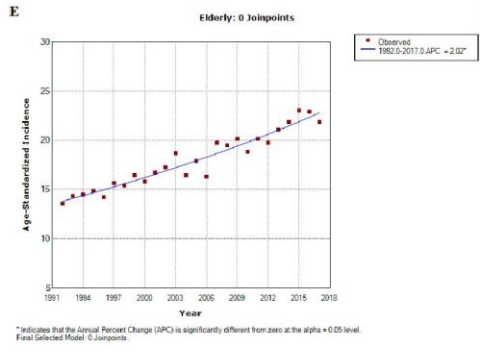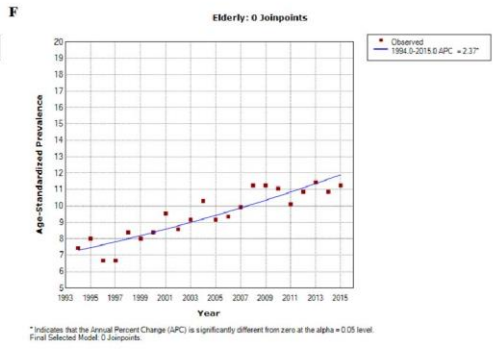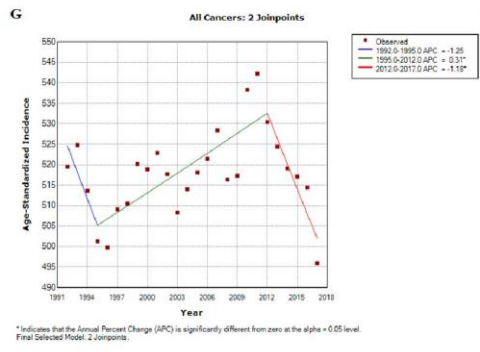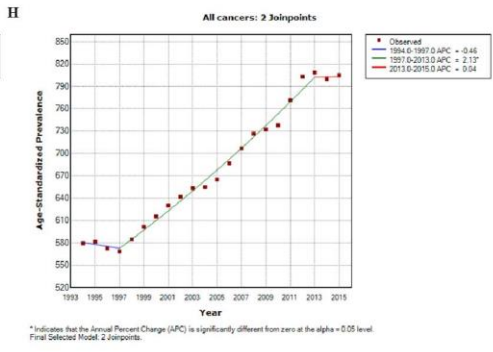

Supplement: 2020-0295-2-at.pdf [file 2020-0295-2-at.pdf]
